# Supplementary material for: Liver Fat, Hepatic Enzymes, Alkaline Phosphatase and the Risk of Incident Type 2 Diabetes: A Prospective Study of 132,377 Adults
Source: PubMed Central journal article supplement (PMC5498613; doi:10.1038/s41598-017-04631-7), 2017-07-05
Supplement: 41598_2017_4631_MOESM1_ESM.pdf [file 41598_2017_4631_MOESM1_ESM.pdf]

## TITLE PAGE

**Title:** Liver Fat, Hepatic Enzymes, Alkaline Phosphatase and the Risk of Incident Type 2

Diabetes: A Prospective Study of 132,377 Adults

**Short running title:** Liver-Related Risk Factors for Type 2 Diabetes

### Authors

Sean Chun-Chang Chen <sup>1</sup>

Shan Pou Tsai <sup>2</sup>

Wun-Kai Jiang <sup>2</sup>

Jing-Yun Jhao <sup>2</sup>

Chwen Keng Tsao <sup>2</sup>

Ly-Yun Chang <sup>2,3\*</sup>

### Affiliations

<sup>1</sup>*Graduate Institute of Biomedical Informatics, College of Medical Science and Technology,*

*Taipei Medical University, Taipei, 110, Taiwan*

<sup>2</sup>*MJ Health Management Institution, Taipei, 114, Taiwan.*

<sup>3</sup>*Institute of Sociology, Academia Sinica, Taipei, 115, Taiwan.*

**\*Corresponding author:** Ly-Yun Chang; phone: +886-2-2793-7878 #22; fax: +886-2-2793-

0399; email: [sociochang@gmail.com](mailto:sociochang@gmail.com)

**Supplemental Table 1 Analysis methods and reference value of two different machines, HITACHI 7150 (1995-2004) and TOSHIBA C8000 (2005-).**

| HITACHI 7150 (1995-2004) |                                                |                          |                 | TOSHIBA C8000 (2005-)    |                            |           |
|--------------------------|------------------------------------------------|--------------------------|-----------------|--------------------------|----------------------------|-----------|
|                          | Analysis Method                                | Reference                | SE              | Analysis Method          | Reference                  | SE        |
| <b>TG</b>                | Free Glycerol Blanking Method                  | 35-200 mg/dl             | NA <sup>a</sup> | GPO-POD-ESPT             | ≤150mg/dl                  | 1.0-1.6   |
| <b>ALT</b>               | UV with P5P                                    | 5-33 U/L                 | NA <sup>a</sup> | UV with P5P              | 5-33 U/L                   | 0.39-1.29 |
| <b>AST</b>               | UV with P5P                                    | 10-27 U/L                | NA <sup>a</sup> | UV with P5P              | 10-27 U/L                  | 0.65-1.43 |
| <b>GGT</b>               | γ-L-Glutamyl-p-nitroanilide Chlorate Substrate | M: <50 U/L<br>W: <39 U/L | NA <sup>a</sup> | Glu-3-CA-4NA             | M: < 50 U/L<br>W: < 39 U/L | 0.45-1.24 |
| <b>ALP</b>               | Kinetic assay                                  | 66-220 U/L               | NA <sup>a</sup> | PNPPDEA (diethanolamine) | 35-104 U/L                 | 5.9-8.3   |

Abbreviations: SE: standard error, TG, triglycerides; ALT, alanine transaminase; AST, aspartate transaminase; GGT, gamma-glutamyltransferase; ALP, alkaline phosphatase. M: men; W: women. <sup>a</sup> NA: the vendor was unable to provide SE.

**Supplemental Table 2 Mean and SD of clinical tests using two different machines, HITACHI 7150 (1995-2004) and TOSHIBA C8000 (2005-).**

|                           | Men (n=65249)             |                      | Women (n=67946)           |                      |
|---------------------------|---------------------------|----------------------|---------------------------|----------------------|
|                           | Non-diabetes<br>(n=61155) | Diabetes<br>(n=4094) | Non-diabetes<br>(n=64710) | Diabetes<br>(n=3236) |
| <i>Clinical</i>           |                           |                      |                           |                      |
| FPG (mg/dL)               |                           |                      |                           |                      |
| 1996-2004                 | 97.1 ± 7.8                | 106.4 ± 9.8          | 94.3 ± 7.8                | 105.2 ± 10.3         |
| 2005-2014                 | 98.9 ± 7.6                | 111.3 ± 10.1         | 94.8 ± 7.8                | 110.1 ± 9.0          |
| Total cholesterol (mg/dL) |                           |                      |                           |                      |
| 1996-2004                 | 200.4 ± 35.2              | 208.5 ± 37.0         | 197.0 ± 36.4              | 211.3 ± 39.2         |
| 2005-2014                 | 199.0 ± 34.2              | 204.2 ± 37.1         | 192.4 ± 34.1              | 209.6 ± 38.2         |
| Triglycerides (mg/dL)     |                           |                      |                           |                      |
| 1996-2004                 | 132.8 ± 76.0              | 172.5 ± 98.6         | 99.5 ± 56.7               | 148.9 ± 92.2         |
| 2005-2014                 | 132.0 ± 76.3              | 175.6 ± 92.9         | 87.6 ± 50.8               | 139.0 ± 68.9         |
| HDL-C (mg/dL)             |                           |                      |                           |                      |
| 1996-2004                 | 46.0 ± 12.9               | 42.2 ± 12.2          | 56.6 ± 15.2               | 49.9 ± 14.3          |
| 2005-2014                 | 50.6 ± 11.6               | 46.1 ± 10.4          | 63.5 ± 14.9               | 54.9 ± 13.5          |
| ALT (U/L)                 |                           |                      |                           |                      |
| 1996-2004                 | 31.9 ± 34.5               | 41.9 ± 33.2          | 20.6 ± 21.2               | 30.6 ± 33.9          |
| 2005-2014                 | 36.1 ± 36.6               | 49.3 ± 34.8          | 20.9 ± 19.2               | 34.0 ± 30.1          |
| AST (U/L)                 |                           |                      |                           |                      |
| 1996-2004                 | 25.3 ± 18.4               | 28.9 ± 17.4          | 21.4 ± 13.8               | 26.4 ± 22.9          |
| 2005-2014                 | 25.8 ± 17.6               | 30.7 ± 15.4          | 21.1 ± 11.7               | 27.3 ± 16.6          |
| GGT (U/L)                 |                           |                      |                           |                      |
| 1996-2004                 | 29.6 ± 32.7               | 42.0 ± 48.9          | 17.4 ± 18.8               | 26.5 ± 26.5          |
| 2005-2014                 | 35.0 ± 37.8               | 53.9 ± 53.0          | 18.9 ± 24.0               | 30.8 ± 33.1          |
| ALP (U/L)                 |                           |                      |                           |                      |
| 1996-2004                 | 144.1 ± 43.3              | 149.5 ± 44.7         | 128.1 ± 49.4              | 151.7 ± 54.7         |
| 2005-2014                 | 66.2 ± 16.9               | 69.3 ± 19.1          | 57.6 ± 19.1               | 68.8 ± 19.7          |

Abbreviations: FPG, fasting plasma glucose; HDL-C, high-density lipoprotein cholesterol; ALT, alanine transaminase; AST, aspartate transaminase; GGT, gamma-glutamyltransferase; ALP, alkaline phosphatase.

**Supplemental table 3 Variance inflation factors (VIFs) of variables in the models**

|                                                 | VIF             |       |
|-------------------------------------------------|-----------------|-------|
|                                                 | Men             | Women |
| <i>Demographic Variables</i>                    |                 |       |
| Age $\geq$ 65 (years)                           | 1.12            | 1.15  |
| Family history of diabetes (yes)                | 1.26            | 1.26  |
| Hypertension (yes)                              | 1.31            | 1.35  |
| BMI ( $\geq$ 27)                                | 1.36            | 1.30  |
| <i>Health Behavior</i>                          |                 |       |
| Smoking (yes)                                   | 1.55            | 1.08  |
| Drinking (yes)                                  | 1.51            | 1.10  |
| Physical activity (active <sup>a</sup> )        | NA <sup>d</sup> | 1.65  |
| <i>Clinical</i>                                 |                 |       |
| Cholesterol $>$ 240 mg/dL                       | 1.18            | 1.18  |
| TG $>$ 200 or $>$ 150 mg/dL <sup>b</sup>        | 1.19            | 1.11  |
| HDL-C $\geq$ 40 or $\geq$ 50 mg/dL <sup>c</sup> | 2.01            | 1.86  |
| NAFLD (yes)                                     | 1.93            | 1.48  |
| ALT $>$ 33 U/L                                  | 2.53            | 2.10  |
| AST $>$ 27 U/L                                  | 2.11            | 2.04  |
| GGT $\geq$ 39 or $\geq$ 50 U/L <sup>c</sup>     | 1.39            | 1.25  |
| ALP $>$ 220 or $>$ 104 U/L <sup>b</sup>         | 1.04            | 1.08  |
| Mean                                            | 1.53            | 1.40  |

Abbreviations: TG, triglycerides; HDL-C, high-density lipoprotein cholesterol; NAFLD, non alcoholic fatty acid disease; ALT, alanine transaminase; AST, aspartate transaminase; GGT, gamma-glutamyltransferase; ALP, alkaline phosphatase. <sup>a</sup>Active: metabolic equivalent of task (MET)-hours per week  $\geq$  3.75. <sup>b</sup>Because a new analyzer was used in 2005, the abnormal range for TG is  $>$  200 mg/dL (2000-2004) or  $>$ 150 mg/dL (2005-); for ALP is  $>$ 220 U/L (2000-2004) or  $>$ 104 U/L (2005-). <sup>c</sup> The cut-points for high levels of HDL-C and GGT are different in men ( $\geq$  40 mg/dL for HDL-C and  $\geq$ 50 U/L for GGT) and women ( $\geq$  50 mg/dL for HDL-C and  $\geq$ 39 U/L for GGT). <sup>d</sup>The model was stratified by physical activity because the proportional hazard assumption was not satisfied for physical activity in men.

**Supplemental Table 4 Adjusted hazard ratio (HR) of type 2 diabetes in men and women excluding individuals with excessive alcohol consumption or viral hepatitis B**

|                                          | Men (n=49635)       |             | Women (n=58751)     |             |
|------------------------------------------|---------------------|-------------|---------------------|-------------|
|                                          | HR                  | 95% CI      | HR                  | 95% CI      |
| <i>Demographic Variables</i>             |                     |             |                     |             |
| Age ≥ 65 (years)                         | 2.21 <sup>***</sup> | [1.93,2.53] | 1.80 <sup>***</sup> | [1.57,2.06] |
| Family history of diabetes (yes)         | 1.65 <sup>***</sup> | [1.52,1.79] | 1.60 <sup>***</sup> | [1.46,1.75] |
| Hypertension (yes)                       | 1.84 <sup>***</sup> | [1.68,2.01] | 2.21 <sup>***</sup> | [2.02,2.43] |
| BMI (≥27)                                | 1.99 <sup>***</sup> | [1.82,2.18] | 2.07 <sup>***</sup> | [1.88,2.28] |
| <i>Health Behavior</i>                   |                     |             |                     |             |
| Smoking (yes)                            | 1.22 <sup>***</sup> | [1.12,1.32] | 0.89                | [0.71,1.13] |
| Drinking (yes)                           | 1.05                | [0.95,1.15] | 1.41 <sup>***</sup> | [1.18,1.69] |
| Physical activity (active <sup>a</sup> ) | NA <sup>d</sup>     |             | 1.00                | [0.92,1.08] |
| <i>Clinical</i>                          |                     |             |                     |             |
| Total cholesterol >240 mg/dL             | 1.18 <sup>**</sup>  | [1.06,1.30] | 1.50 <sup>***</sup> | [1.36,1.66] |
| TG >200 or >150 mg/dL <sup>b</sup>       | 1.36 <sup>***</sup> | [1.24,1.51] | 1.49 <sup>***</sup> | [1.32,1.67] |
| HDL-C ≥ 40 or ≥50 mg/dL <sup>c</sup>     | 0.81 <sup>***</sup> | [0.75,0.88] | 0.67 <sup>***</sup> | [0.61,0.73] |
| NAFLD (yes)                              | 1.98 <sup>***</sup> | [1.81,2.16] | 2.71 <sup>***</sup> | [2.47,2.97] |
| ALT >33 U/L                              | 1.24 <sup>***</sup> | [1.12,1.38] | 1.58 <sup>***</sup> | [1.37,1.83] |
| AST >27 U/L                              | 1.28 <sup>***</sup> | [1.15,1.41] | 1.15                | [1.00,1.32] |
| GGT ≥39 or ≥50 U/L <sup>c</sup>          | 1.52 <sup>***</sup> | [1.37,1.69] | 1.53 <sup>***</sup> | [1.35,1.73] |
| ALP >220 or >104 U/L <sup>b</sup>        | 1.40 <sup>***</sup> | [1.17,1.69] | 1.45 <sup>***</sup> | [1.23,1.70] |

95% confidence intervals (CI) in brackets. \*  $p < 0.05$ , \*\*  $p < 0.01$ , \*\*\*  $p < 0.001$ .

Abbreviations: TG, triglycerides; HDL-C, high-density lipoprotein cholesterol; NAFLD, non alcoholic fatty acid disease; ALT, alanine transaminase; AST, aspartate transaminase; GGT, gamma-glutamyltransferase; ALP, alkaline phosphatase. <sup>a</sup>Active: metabolic equivalent of task (MET)-hours per week  $\geq 3.75$ . <sup>b</sup>Because a new analyzer was used in 2005, the abnormal range for TG is > 200 mg/dL (2000-2004) or >150 mg/dL (2005-); for ALP is >220 U/L (2000-2004) or >104 U/L (2005-). <sup>c</sup>The cut-points for high levels of HDL-C and GGT are different in men ( $\geq 40$  mg/dL for HDL-C and  $\geq 50$  U/L for GGT) and women ( $\geq 50$  mg/dL for HDL-C and  $\geq 39$  U/L for GGT). <sup>d</sup>The model was stratified by physical activity because the proportional hazard assumption was not satisfied for physical activity in men.
